# Supplementary material for: Olig2 regulates Purkinje cell generation in the early developing mouse cerebellum
Source: PubMed Central journal article supplement (PMC4965836; doi:10.1038/srep30711), 2016-07-29
Supplement: srep30711-s1.pdf [file srep30711-s1.pdf]

## Supplemental material

**Title:** Olig2 regulates Purkinje cell generation in the early developing mouse cerebellum

Jun Ju<sup>1,4,†</sup>, Qian Liu<sup>1,†</sup>, Yang Zhang<sup>1,4</sup>, Yuanxiu Liu<sup>1,4</sup>, Mei Jiang<sup>1</sup>, Liguozhang<sup>5</sup>, Xuelian He<sup>5</sup>, Chenchen Peng<sup>1,4</sup>, Tao Zheng<sup>1</sup>, Q. Richard Lu<sup>5</sup> and Hedong Li<sup>1,2,3,\*</sup>

<sup>1</sup>West China Developmental & Stem Cell Institute, <sup>2</sup>Department of Obstetric & Gynecologic and Pediatric, <sup>3</sup>Key Laboratory of Obstetric & Gynecologic and Pediatric Diseases and Birth Defects, Ministry of Education, West China Second University Hospital, <sup>4</sup>School of Life Science, Sichuan University, Chengdu 610041, P.R. China, <sup>5</sup>Department of Pediatrics, Cincinnati Children's Hospital Medical Center, Cincinnati, Ohio 45229, USA

†These authors contributed equally to this work.

**Supplemental Figure 1:**

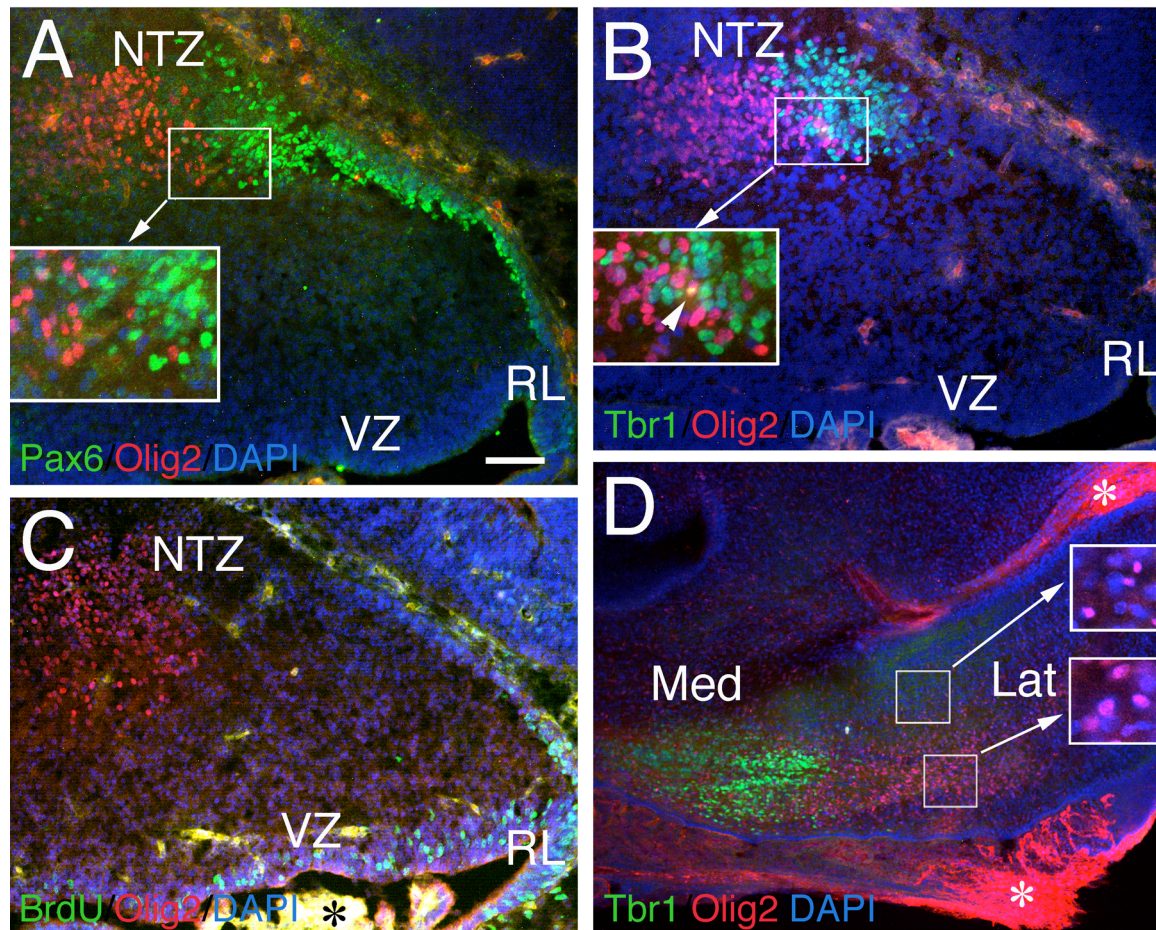

**Figure S1. The NTZ  $Olig2^+$  cells represent a distinct subpopulation of DCN neurons in the embryonic cerebellum.** Mid-sagittal sections of the E14.5 (A-C) and coronal sections of the E18.5 (D) wild-type cerebella are immunostained. The NTZ  $Olig2$  and Pax6 (to label GNPs) show a non-overlapping pattern (A). Between the  $Olig2^+$  and Pax6<sup>+</sup> domains, there are a group of cells that are negative for both markers, but positive for Tbr1 (to label a subset of DCN neurons) (B). Higher magnification views of the boxed regions are shown as inserts in (A and B). Although the  $Olig2^+$  and Tbr1<sup>+</sup> domains are closer in position with double positive cells being occasionally seen (B, insert, arrowhead), they are largely non-overlapping. In addition, the NTZ  $Olig2^+$  cells are nearly all postmitotic as indicated by their inability to take up BrdU in a BrdU-pulse labeling experiment (C). Notably, a number of BrdU<sup>+</sup> cells can still be found in the VZ, and yet  $Olig2$  expression has already disappeared in this region at this developmental stage. At E18.5, while Tbr1<sup>+</sup> neurons concentrate to the medial (Med) part of the DCN,  $Olig2$  expression is more towards the lateral (Lat) region (D). Two morphologically distinct  $Olig2^+$  cells are found with smaller cells being located in the periphery of the  $Olig2^+$  domain and bigger cells being in the core (D, inserts). Non-specific staining signals from the choroids plexus and a representative blood vessel are indicated by asterisks in (C) and (D). VZ, ventricular zone; RL, rhombic lip; NTZ, nuclear transitory zone. Scale bar: 80  $\mu$ m in A-C; 160  $\mu$ m in D.
